# Supplementary material for: Intermittent muscle activity in the feedback loop of postural control system during natural quiet standing
Source: PubMed Central journal article supplement (PMC5587544; doi:10.1038/s41598-017-10015-8), 2017-09-06
Supplement: 41598_2017_10015_MOESM1_ESM.pdf [file 41598_2017_10015_MOESM1_ESM.pdf]

1

2 **Supplementary materials for:**

3

4 **Intermittent muscle activity in the feedback loop of postural**  
5 **control system during natural quiet standing**

6 H. Tanabe, K. Fujii, M. Kouzaki

7

8 **This PDF file includes:**

9 **A. Joint angle and torque calculation**

10 **B. Motion equation of the inverted pendulum**

11

## 12 A. Joint angle and torque calculation

13 Definitions of angular displacements of the ankle, knee, and hip are shown in  
14 Figure A1. Ankle dorsiflexion, knee extension, and hip forward flexion were defined to  
15 be positive direction.

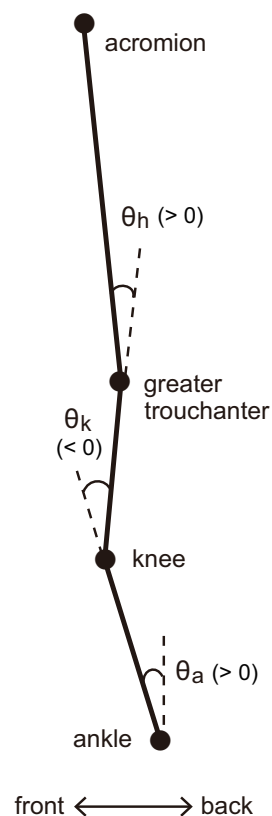

16 **Figure A1:** A triple inverted pendulum model. A model for a human quiet standing in  
17 the sagittal plane. Each of four links represent shank (ankle–knee), thigh (knee–hip),  
18 and head-and-trunk segments, from the bottom. Joint angles were defined as relative  
19 angles between adjacent joints except for joint angle of the MP being relative to the  
20 vertical line.

21

22 Joint torque was calculated by inverse dynamics. The x and y axes represent

23 anteroposterior and vertical directions, respectively. Due to the equilibrium of force at  
24 the lowest segment (i.e., the foot),

$$25 \quad R_{ax} + F_x = 0$$

$$26 \quad R_{ay} + F_y - m_f g = 0$$

27 where  $R_{ax}$  and  $R_{ay}$  represent the joint reaction force at the ankle in anteroposterior and  
28 vertical directions, respectively.  $F_x$  and  $F_y$  are the ground reaction force, where subscripts  
29 represent each direction of axis. The term  $m_f g$  is gravitational force applied to the foot  
30 (i.e.,  $m_f$  is a mass of the foot). The equilibrium of moment around the center of mass  
31 (COM) of foot segment leads to the following equation,

$$32 \quad M_a + rR_{ay} - pF_y = 0$$

33 where  $M_a$  is the ankle moment in the plantarflexion direction, and  $r$  and  $p$  are a  
34 horizontal distances between the ankle and foot COM and between foot COM and the  
35 center of pressure. Because we defined the ankle dorsiflexion direction to be positive,  
36 the ankle torque  $T_a$  is the opposite sign of  $M_a$ .

37 The motion equation of the upper segments (i.e. shank, thigh, and upper body) is  
38 expressed as follows:

$$39 \quad m_i a_x = R_{xp} + R_{xd}$$

$$40 \quad m_i a_y = R_{yp} + R_{yd} - m_i g$$

41 where  $m_i$  is a mass of  $i$ th segment,  $a_x$  and  $a_y$  are acceleration of  $i$ th segment's COM in  
42 anteroposterior and vertical directions, respectively,  $R_{xp}$  and  $R_{yp}$  are joint reaction forces

43 at the proximal end in the anteroposterior and vertical directions, and  $R_{xd}$  and  $R_{yd}$  are  
 44 joint reaction forces at the distal end in the anteroposterior and vertical directions (i.e.,  
 45 joint reaction force at the ankle for the shank). These two equations lead the joint  
 46 reaction force at the proximal end. Then, joint moment at the  $i$ th segment (equivalent to  
 47  $M_d$  in the following equation) can be derived from the following Euler's momentum  
 48 equation:

$$49 \quad I_i \ddot{\theta}_i = M_{pi} - M_{di} + R_{xp} r_i \cos \theta_i - R_{yp} r_i \sin \theta_i - R_{xd} (l_i - r_i) \cos \theta_i + R_{yd} (l_i - r_i) \sin \theta_i$$

50 where the subscript  $i$  represents the  $i$ th segment,  $I$  is the inertial moment,  $\theta$  is the  
 51 angular displacement,  $M_p$  and  $M_d$  are the joint moment in the backward direction (i.e.,  
 52 the ankle plantarflexion, knee flexion, and hip backward flexion) at the proximal and  
 53 distal ends, respectively,  $r$  is a length between proximal end and segment COM, and  $l$  is  
 54 a segment length. Because we defined the knee extension and hip forward flexion to be  
 55 positive, the torque at the knee and hip is the opposite sign of  $M_p$  of shank and thigh  
 56 segments, respectively.

57

## 58 **B. Motion equation of the inverted pendulum**

### 59 **B.1 Model definition**

$$60 \quad M_{11} = I_1 + I_2 + I_3 + r_1^2 m_1 + r_2^2 m_2 + l_1^2 m_2 + 2l_1 m_2 r_2$$

$$61 \quad + r_3^2 m_3 + l_1^2 m_3 + l_2^2 m_3 + 2l_1 m_3 l_2 + 2l_2 m_3 r_3 + 2l_1 m_3 r_3$$

$$62 \quad M_{12} = I_2 + I_3 + r_2^2 m_2 + l_1 m_2 r_2 + r_3^2 m_3 + l_2^2 m_3 + l_1 m_3 l_2 + 2l_2 m_3 r_3 + l_1 m_3 r_3$$

63  $M_{13} = I_3 + r_3^2 m_3 + l_2 m_3 r_3 + l_1 m_3 r_3$

64  $M_{21} = I_2 + I_3 + r_2^2 m_2 + l_1 m_2 r_2 + r_3^2 m_3 + l_2^2 m_3 + l_1 m_3 l_2 + 2l_2 m_3 r_3 + l_1 m_3 r_3$

65  $M_{22} = I_2 + I_3 + r_2^2 m_2 + r_3^2 m_3 + l_2^2 m_3 + 2l_2 m_3 r_3$

66  $M_{23} = I_3 + r_3^2 m_3 + l_2 m_3 r_3$

67  $M_{31} = I_3 + r_3^2 m_3 + l_2 m_3 r_3 + l_1 m_3 r_3$

68  $M_{32} = I_3 + r_3^2 m_3 + l_2 m_3 r_3$

69  $M_{33} = I_3 + r_3^2 m_3$

70  $G_{11} = -g(r_1 m_1 + l_1 m_2 + l_1 m_3 + r_2 m_2 + l_2 m_3 + r_3 m_3)$

71  $G_{12} = -g(r_2 m_2 + l_2 m_3 + r_3 m_3)$

72  $G_{13} = -g m_3 r_3$

73  $G_{21} = -g(r_2 m_2 + l_2 m_3 + r_3 m_3)$

74  $G_{22} = -g(r_2 m_2 + l_2 m_3 + r_3 m_3)$

75  $G_{23} = -g m_3 r_3$

76  $G_{31} = -g m_3 r_3$

77  $G_{32} = -g m_3 r_3$

78  $G_{33} = -g m_3 r_3$

79 where  $I_i$ ,  $m_i$ ,  $l_i$ , and  $r_i$  represent the  $i$ th segment's inertia moment around the distal end,  
 80 the mass, the length, and the length between the distal end and center of mass,  
 81 respectively.

82

## 83 **B.2 First order differential equation**

84 The passive joint torque in the motion equation (eq. 1) can be represented as  
85 follows:

$$86 \quad T_{passive} = - \begin{bmatrix} \text{diag}(K) & \text{diag}(B) \end{bmatrix} \cdot x$$

87 where  $K$  and  $B$  are vectors of elastic and viscosity components, respectively, and  $x$  is  
88 the state variable vector consisted of three joint angles and three angular velocities.

89 The expression  $\text{diag}(v)$  is a diagonal matrix composed by vector  $v$ .

90 Therefore, the motion equation (eq. 1) with no active torque can be written as a  
91 following six-dimensional ordinary first order differential equation:

$$92 \quad \begin{bmatrix} E & O \\ O & M \end{bmatrix} \cdot \frac{dx}{dt} = \begin{bmatrix} O & E \\ -\text{diag}(K)+G & -\text{diag}(B) \end{bmatrix} \cdot x$$

93 where  $E$  is a 3-by-3 unit matrix. This elicits the coefficient matrix  $A$  in eq. 2 as  
94 follows:

$$95 \quad A = \begin{bmatrix} E & O \\ O & M \end{bmatrix}^{-1} \begin{bmatrix} O & E \\ -\text{diag}(K)+G & -\text{diag}(B) \end{bmatrix}$$

96

## 97 **B.3 PD gain and passive viscoelasticity**

98 PD gains and passive viscoelasticity coefficients were set to be as follows  
99 based on our previous study (Tanabe et al. 2016) and other simulation studies  
100 (Loram and Lakie 2002; Casadio et al. 2005; Maurer and Peterka 2005; Bottaro et al.

101 2008; Asai et al. 2009; Suzuki et al. 2012):

$$[P_a \quad P_k \quad P_h] = [1.0 \quad 0.4 \quad 0.3] * mgh$$

$$[D_a \quad D_k \quad D_h] = [10 \quad 10 \quad 50]$$

$$[K_a \quad K_k \quad K_h] = [0.6 \quad 20 \quad 0.2] * mgh$$

$$[B_a \quad B_k \quad B_h] = [4 \quad 50 \quad 50]$$

102 We modified these values so that the joint oscillations of the pendulum shows the  
103 similar amplitude and variability as those of actual human quiet standing. It is  
104 important to set relatively larger value of  $D_h$  ( $> 50s$ ) for preventing the model from  
105 falling down.

106
